# Supplementary material
Source: HighWire-hosted journal article supplement (http://molpharm.aspetjournals.org/highwire/filestream/76315/field_highwire_adjunct_files/0/Calon_Figure_S3_reduced.pdf)
Supplement: Calon_Figure_S3_reduced.pdf [file Calon_Figure_S3_reduced.pdf]

## **In vivo labeling of brain capillary endothelial cells following intravenous injection of monoclonal antibodies targeting the transferrin receptor**

Sarah Paris-Robidas, B.Sc., Vincent Emond, Ph.D., Cyntia Tremblay, M.Sc., Denis Soulet, Ph.D., and Frédéric Calon, B.Pharm., Ph.D.

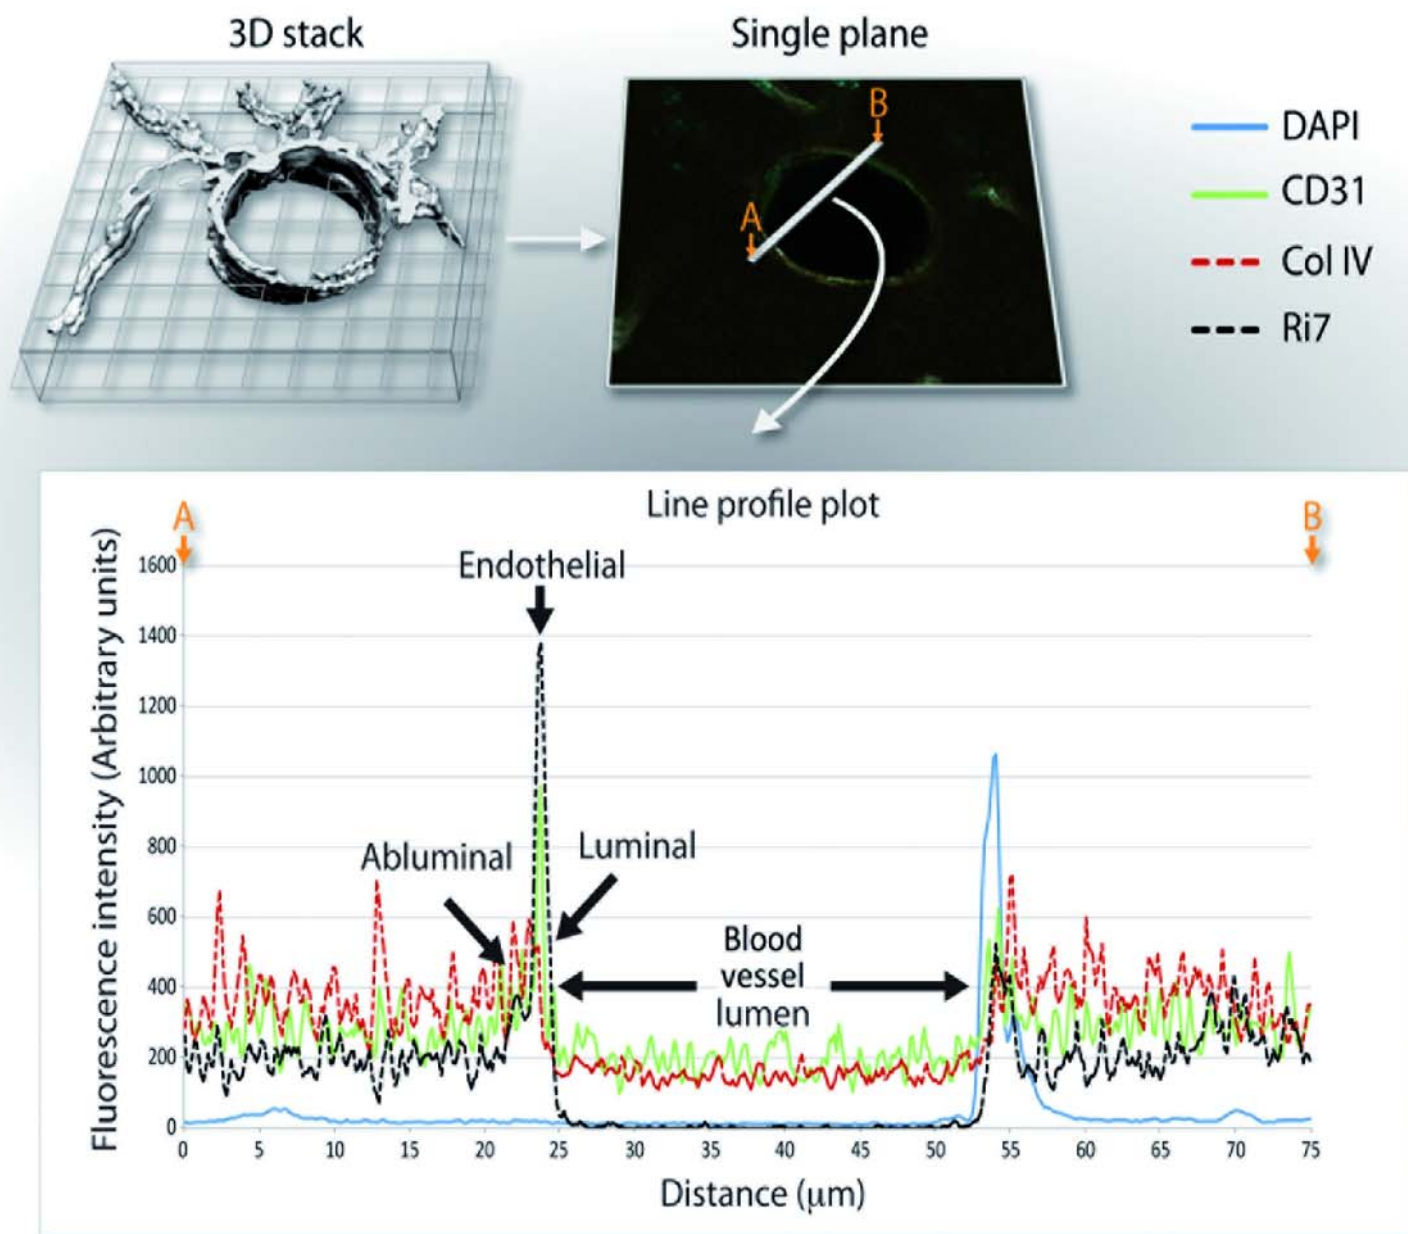

**Figure S3. Line profile plot of the distribution of the anti-TfR MAb Ri7 suggests a luminal, endothelial, and abluminal distribution in brain microvessels.** Mice were injected intravenously with AF647-labeled anti-TfR MAbs (Ri7) and were sacrificed 1 h post-injection. Confocal images from brain microvessels immunolabeled with CD31 (green), DAPI (cyan), basal lamina marker collagen IV (red) and anti-TfR MAbs Ri7 (white) were acquired. Line profile analysis shows the distribution of fluorescence intensity of Ri7 labeling within the abluminal space (collagen IV) and the BCECs as well as the lumen of the capillary. Abbreviations: MAbs, monoclonal antibodies; TfR, transferrin receptor.
